# Supplementary material for: Enhanced room-temperature phosphorescence of triphenylphosphine derivatives without metal and heavy atoms in their crystal phase
Source: Royal Society of Chemistry journal article supplement (doi:10.1039/c6ra07477d), 2016-01-01
Supplement: c6ra07477d1.pdf [file c6ra07477d1.pdf]

# **Enhanced room-temperature phosphorescence of triphenylphosphine derivatives without metal and heavy atom in crystal phase**

Pengchong Xue,<sup>\*a</sup> Panpan Wang,<sup>a</sup> Peng Chen,<sup>b</sup> Jipeng Ding,<sup>a</sup> Ran Lu<sup>a</sup>

<sup>a</sup> College of Chemistry, Jilin University, 2699 Qianjin Street, Changchun, P.R. China

<sup>b</sup> Key Laboratory of Functional Inorganic Material Chemistry (MOE), School of Chemistry and Materials Science, Heilongjiang University, No. 74, Xuefu Road, Nangang District, Harbin, P. R. China

E-mail: xuepengchong@jlu.edu.cn

## EXPERIMENTAL SECTION

**Instruments and experimental methods:** The UV-vis spectra were determined on a Mapada UV-1800pc spectrophotometer. C, H, and N elemental analyses were performed on a Perkin-Elmer 240C elemental analyzer. Photoluminescence measurements were taken on a Shimadzu RF-5301 Luminescence Spectrometer. The absolute fluorescence quantum yields were measured on an Edinburgh FLS920 steady state spectrometer using an integrating sphere. Luminescent decay experiments were measured on an Edinburgh FLS920 spectrometer. EPLED-360 picosecond flash lamp with 898ps pulse duration and  $\mu$ F920 microsecond flash lamp (pulse width  $< 2 \mu$ s) were used to measure time-resolved fluorescent and phosphorescent spectra, respectively.  $^1\text{H}$  and  $^{13}\text{C}$  NMR spectra were recorded on Mercury plus 400 MHz. The fluorescence quantum yields in methylcyclohexane were measured by comparing to standards (9,10-diphenylanthracene in cyclohexane,  $\Phi_{\text{F}} = 0.9$ ). Geometrical optimization was performed by density functional theory (DFT) calculations at B3LYP/6-311G (d, p) level with the Gaussian 09W program package. Electronic transition data obtained by the TD/DFT-B3LYP/6-311G(d,p) calculation based on the configuration at ground state.

Single crystals of **TPPA** and **TPPE** were obtained by slowing solvent evaporation in *n*-hexane and selected for X-ray diffraction analysis on in a Rigaku RAXIS-RAPID diffractometer using graphite-monochromated Mo- $K_{\alpha}$  radiation ( $\lambda = 0.71073 \text{ \AA}$ ). The crystals were kept at room temperature during data collection. The structures were solved by the direct methods and refined on F2 by full-matrix least-square using the SHELXTL-97 program. The C, N, O and H atoms were easily placed from the subsequent Fourier-difference maps and refined anisotropically.

## Synthesis of TPPA and TPPE

The compounds **1** and **3** were synthesized based on the reported method.

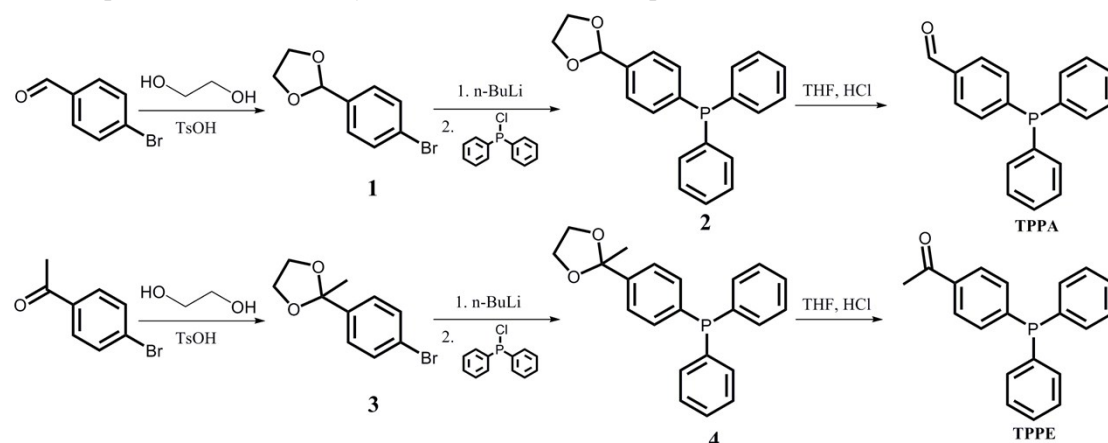

**Scheme S1.** Synthesized route of TPPA and TPPE.

### 2-(4-bromophenyl)-1,3-dioxolane (**1**)

4-bromobenzaldehyde (5.0 g, 27 mmol), ethylene glycol (3.35 g, 54 mmol) and *p*-toluenesulfonic acid (10 mg) were dissolved in toluene (100 mL) and the mixture was refluxed with a Dean-Stark trap to azeotropically remove water. After 10 h, the solution was cooled to room temperature and washed with saturated NaHCO<sub>3</sub> solution and then with saturated NaCl solution. The solution was dried over MgSO<sub>4</sub> and the solvent was evaporated to yield **1**. Yield = 92 %. <sup>1</sup>H NMR (400 MHz, CDCl<sub>3</sub>) δ 7.51 (d, J = 8.4 Hz, 2H), 7.35 (d, J = 8.5 Hz, 2H), 5.77 (s, 1H), 4.15-4.00 (m, 4H).

### 2-(4-Bromophenyl)-2-methyl-1,3-dioxolane (**3**)

A solution of 4'-bromoacetophenone (5.0 g, 25 mmol), ethylene glycol (3.5 g, 56 mol), *p*-toluenesulfonic acid (10 mg) were dissolved in toluene (100 mL) and the mixture was refluxed with a Dean-Stark trap to azeotropically remove water. After 10 h, the solution was cooled to room temperature and washed with saturated NaHCO<sub>3</sub> solution and then with saturated NaCl solution. The solution was dried over MgSO<sub>4</sub> and the solvent was evaporated to yield **3**. Yield = 93 %. 7.46 (d, J = 8.4 Hz, 2 H); 7.36 (d, J = 8.5 Hz, 2 H); 4.08-3.69 (m, 4 H) 1.62 (s, 3 H).

### 4-(diphenylphosphino)benzaldehyde (TPPA)

**3** (3.8 g, 16.6 mmol) was dissolved in dry THF (50 mL) and stirred at -78 °C for 30

min. n-BuLi (8.0 mL, 2.5 M in hexane) was slowly dropped the above solution within 20 min, and the mixture was stirred for another 30 min. After chlorodiphenylphosphine (4.0 g, 18.0 mmol) was added slowly, the mixture was stirred overnight at room temperature.  $\text{NH}_4\text{NO}_3$  aqueous solution and ethyl acetate (50 mL) were added, and organic layer was washed by water and dried over anhydrous  $\text{Na}_2\text{SO}_4$ . The solvent was removed under vacuum. The residue was dissolved in THF/water (50 ml/10 mL), and then concentrated HCl (1 mL) was added and the mixture was stirred for 1h.  $\text{CH}_2\text{Cl}_2$  (50 mL) was added and water phase was extracted by  $\text{CH}_2\text{Cl}_2$  (50 mL). Organic phase was dried over anhydrous  $\text{Na}_2\text{SO}_4$  and the crude product was obtained after solvent was removed. The product was obtained by column chromatography (silica,  $\text{CH}_2\text{Cl}_2/\text{PE} = 1:2$ ). Yield = 12 %.  $^1\text{H}$  NMR (400 MHz,  $\text{CDCl}_3$ ):  $\delta = 10.00$  (s, 1H), 7.80 (d,  $J = 7.2$  Hz, 2H), 7.46 – 7.29 (m, 12H).  $^{13}\text{C}$  NMR (101 MHz,  $\text{CDCl}_3$ )  $\delta = 191.93$  (s), 146.52 (d,  $J = 15.3$  Hz), 136.02 (s), 135.81 (d,  $J = 10.3$  Hz), 134.17 (s), 133.97 (s), 133.63 (s), 133.45 (s), 129.32 (s), 129.31 (d,  $J = 5.5$  Hz), 128.79 (d,  $J = 7.3$  Hz).  $^{31}\text{P}$  NMR (162 MHz,  $\text{CDCl}_3$ )  $\delta = -4.32$ . Element analysis (%): calculated for  $\text{C}_{19}\text{H}_{15}\text{OP}$ : C, 78.61; H, 5.21; found: C, 78.65; H, 5.27.

#### **1-(4-(diphenylphosphino)phenyl)ethanone (TPPE)**

TPPE was synthesized based on the similar procedure to **TPPA**. Yield = 23 %.  $^1\text{H}$  NMR (400 MHz,  $\text{CDCl}_3$ ):  $\delta = 7.88$  (d,  $J = 7.9$  Hz, 2H), 7.34 (m, 12H), 2.58 (s, 3H).  $^{13}\text{C}$  NMR (101 MHz,  $\text{CDCl}_3$ )  $\delta = 197.93$  (s), 144.47 (d,  $J = 14.0$  Hz), 136.96 (s), 136.14 (d,  $J = 10.3$  Hz), 134.20 (s), 134.01 (s), 133.56 (s), 133.38 (s), 129.34 (s), 128.85 (d,  $J = 7.2$  Hz), 128.16 (d,  $J = 6.4$  Hz), 26.78 (s).  $^{31}\text{P}$  NMR (162 MHz,  $\text{CDCl}_3$ )  $\delta = -5.05$ . Element analysis (%): calculated for  $\text{C}_{20}\text{H}_{17}\text{OP}$ : C, 78.93; H, 5.63; found: C, 78.91; H, 5.66.

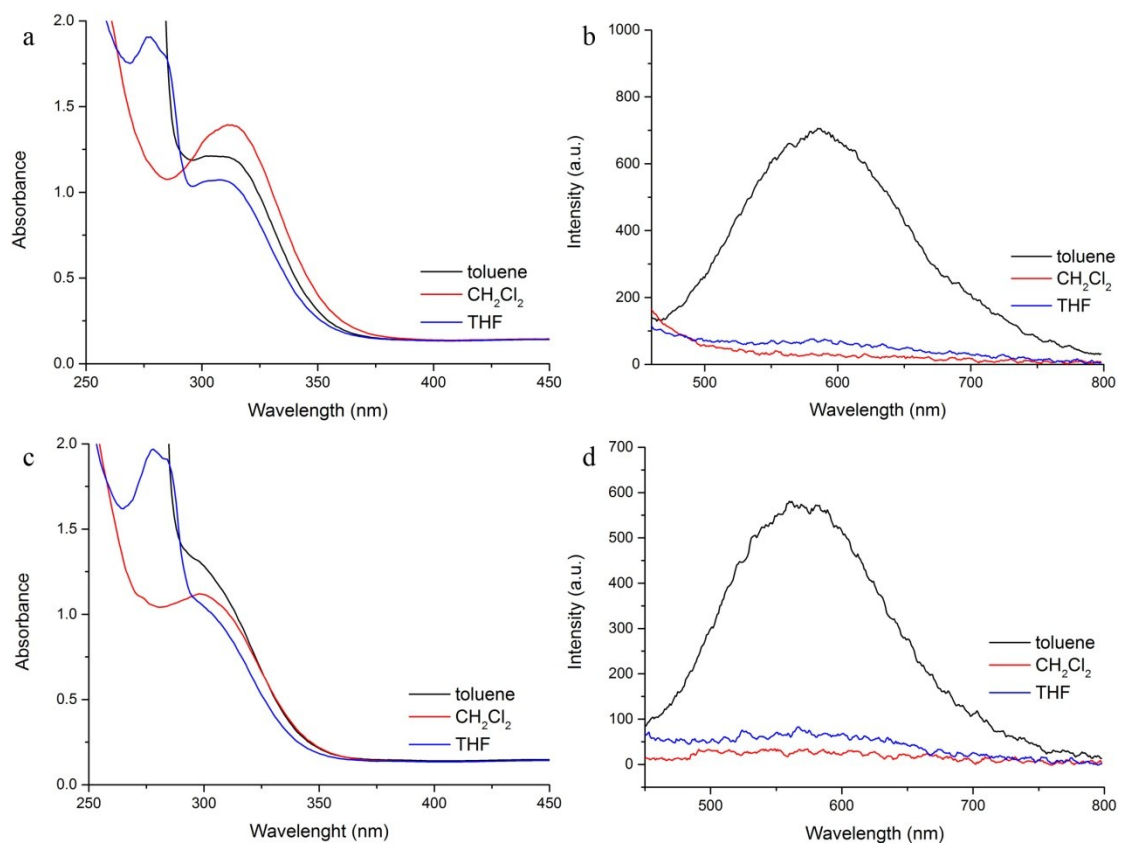

**Fig. S1** Absorption and emission spectra of **TPPA** (a and b) and **TPPE** (c and d) in different solvents in N<sub>2</sub> atmosphere.  $\lambda_{ex} = 300$  nm.

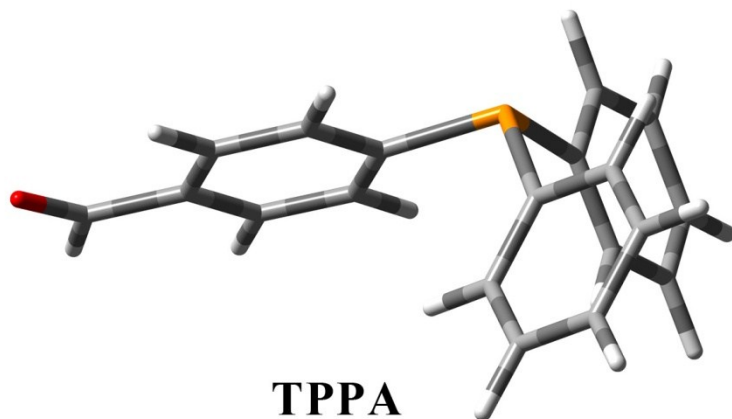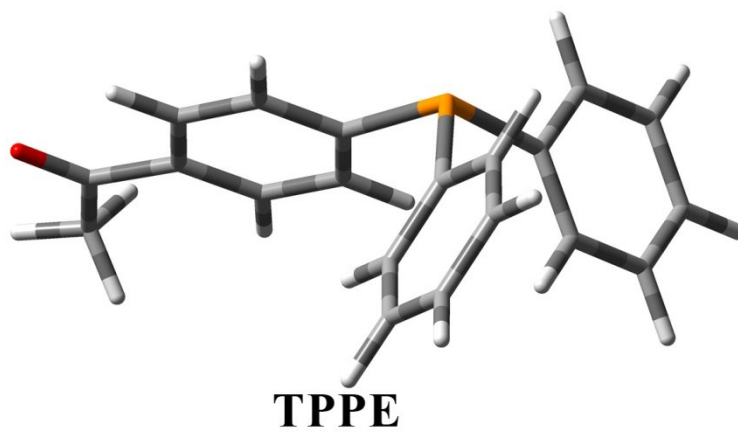

**Fig. S2** Optimal molecular structures of TPPA and TPPE.

**Table S1.** Computed vertical excitation spectra of **TPPA** in vacuum based on the optimal structure at ground state.

| Excited State             | Transition                                                                                                                                                                                                                                                                                                      | Bandgap (eV) | Absorption (nm) | Oscillator strength |
|---------------------------|-----------------------------------------------------------------------------------------------------------------------------------------------------------------------------------------------------------------------------------------------------------------------------------------------------------------|--------------|-----------------|---------------------|
| Triplet (T <sub>1</sub> ) | HOMO-7-LUMO (9.8%); HOMO-5-LUMO (2.6%); HOMO-4-LUMO (7.7%); HOMO-2-LUMO (5.7%); HOMO-LUMO (74.2%)                                                                                                                                                                                                               | 2.9665       | 417.95          | 0.0000              |
| Triplet (T <sub>2</sub> ) | HOMO-1-LUMO (93.7%); HOMO-2-LUMO+6 (6.3%)                                                                                                                                                                                                                                                                       | 3.0891       | 401.36          | 0.0000              |
| Triplet (T <sub>3</sub> ) | HOMO-6-LUMO+1 (3.82%); HOMO-6-LUMO+3 (3.25%); HOMO-5-LUMO+3 (10.4%); HOMO-4-LUMO+1 (6.8%); HOMO-4-LUMO+4 (3.6%); HOMO-3-LUMO+2 (11.1%); HOMO-2-LUMO+3 (7.2%); HOMO-2-LUMO+5 (6.9%); HOMO-LUMO (46.9%)                                                                                                           | 3.5861       | 345.73          | 0.0000              |
| Single (S <sub>1</sub> )  | HOMO-1-LUMO (96.7%); HOMO-1-LUMO+6 (3.4%);                                                                                                                                                                                                                                                                      | 3.6314       | 341.43          | 0.0003              |
| Triplet (T <sub>4</sub> ) | HOMO-5-LUMO+1 (4.2%); HOMO-5-LUMO+2 (7.6%); HOMO-4-LUMO+2 (5.0%); HOMO-4-LUMO (2.4%); HOMO-4-LUMO+1 (9.6%); HOMO-4-LUMO+3 (3.0%); HOMO-3-LUMO+1 (7.1%); HOMO-3-LUMO+2 (5.4%); HOMO-3-LUMO+5 (4.6%); HOMO-2-LUMO+1 (7.2%); HOMO-2-LUMO+1 (3.2%); HOMO-2-LUMO+1 (8.7%); HOMO-2-LUMO+4 (8.9%); HOMO-LUMO+3 (23.1%) | 3.6478       | 339.89          | 0.0000              |
| Singlet (S <sub>2</sub> ) | HOMO-LUMO (100%)                                                                                                                                                                                                                                                                                                | 3.7702       | 328.85          | 0.2170              |

**Table S2.** Computed vertical excitation spectra of **TPPE** in vacuum based on the optimal structure at ground state.

| Excited State             | Transition                                                                                                                                                                                                                                                                                                                                                | Bandgap (eV) | Absorption (nm) | Oscillator strength |
|---------------------------|-----------------------------------------------------------------------------------------------------------------------------------------------------------------------------------------------------------------------------------------------------------------------------------------------------------------------------------------------------------|--------------|-----------------|---------------------|
| Triplet (T <sub>1</sub> ) | HOMO-7–LUMO (8.6%); HOMO-6–LUMO (4.4%);<br>HOMO-4–LUMO (9.0%); HOMO-2–LUMO (6.5%);<br>HOMO–LUMO (71.5%)                                                                                                                                                                                                                                                   | 3.0591       | 405.29          | 0.0000              |
| Triplet (T <sub>2</sub> ) | HOMO-1–LUMO (93.3%); HOMO-1–LUMO+6 (6.7%)                                                                                                                                                                                                                                                                                                                 | 3.1632       | 391.95          | 0.0000              |
| Triplet (T <sub>3</sub> ) | HOMO-6–LUMO+1 (5.3%);HOMO-3–LUMO+3 (6.0%);<br>HOMO-5–LUMO+3 (7.1%);HOMO-5–LUMO+4 (2.8%);<br>HOMO-4–LUMO+1 (5.5%);HOMO-4–LUMO+2 (2.6%);<br>HOMO-3–LUMO+4 (9.8%);HOMO-2–LUMO+52 (7.1%);<br>HOMO-2–LUMO+5 (5.4%);HOMO–LUMO+1 (48.4%)                                                                                                                         | 3.5826       | 346.07          | 0.0000              |
| Triplet (T <sub>4</sub> ) | HOMO-6–LUMO+1 (7.7%); HOMO-6–LUMO+3 (2.6%);<br>HOMO-5–LUMO+1 (5.4%); HOMO-5–LUMO+2 (6.5%);<br>HOMO-5–LUMO+5 (2.6%); HOMO-4–LUMO+1 (7.9%);<br>HOMO-4–LUMO+4 (6.9%); HOMO-3–LUMO+1 (6.9%);<br>HOMO-3–LUMO+2 (3.2%); HOMO-3–LUMO+5 (5.1%);<br>HOMO-2–LUMO (2.9%); HOMO-2–LUMO+3 (7.5%);<br>HOMO-2–LUMO+4 (9.6%); HOMO–LUMO+2 (3.1 %);<br>HOMO–LUMO+3 (22.1%) | 3.6464       | 340.02          | 0.0000              |
| Single (S <sub>1</sub> )  | HOMO-1–LUMO (96.5%); HOMO-1–LUMO+6 (3.5%)                                                                                                                                                                                                                                                                                                                 | 3.6828       | 336.66          | 0.0003              |
| Singlet (S <sub>2</sub> ) | HOMO–LUMO (100%)                                                                                                                                                                                                                                                                                                                                          | 3.8460       | 322.37          | 0.2073              |



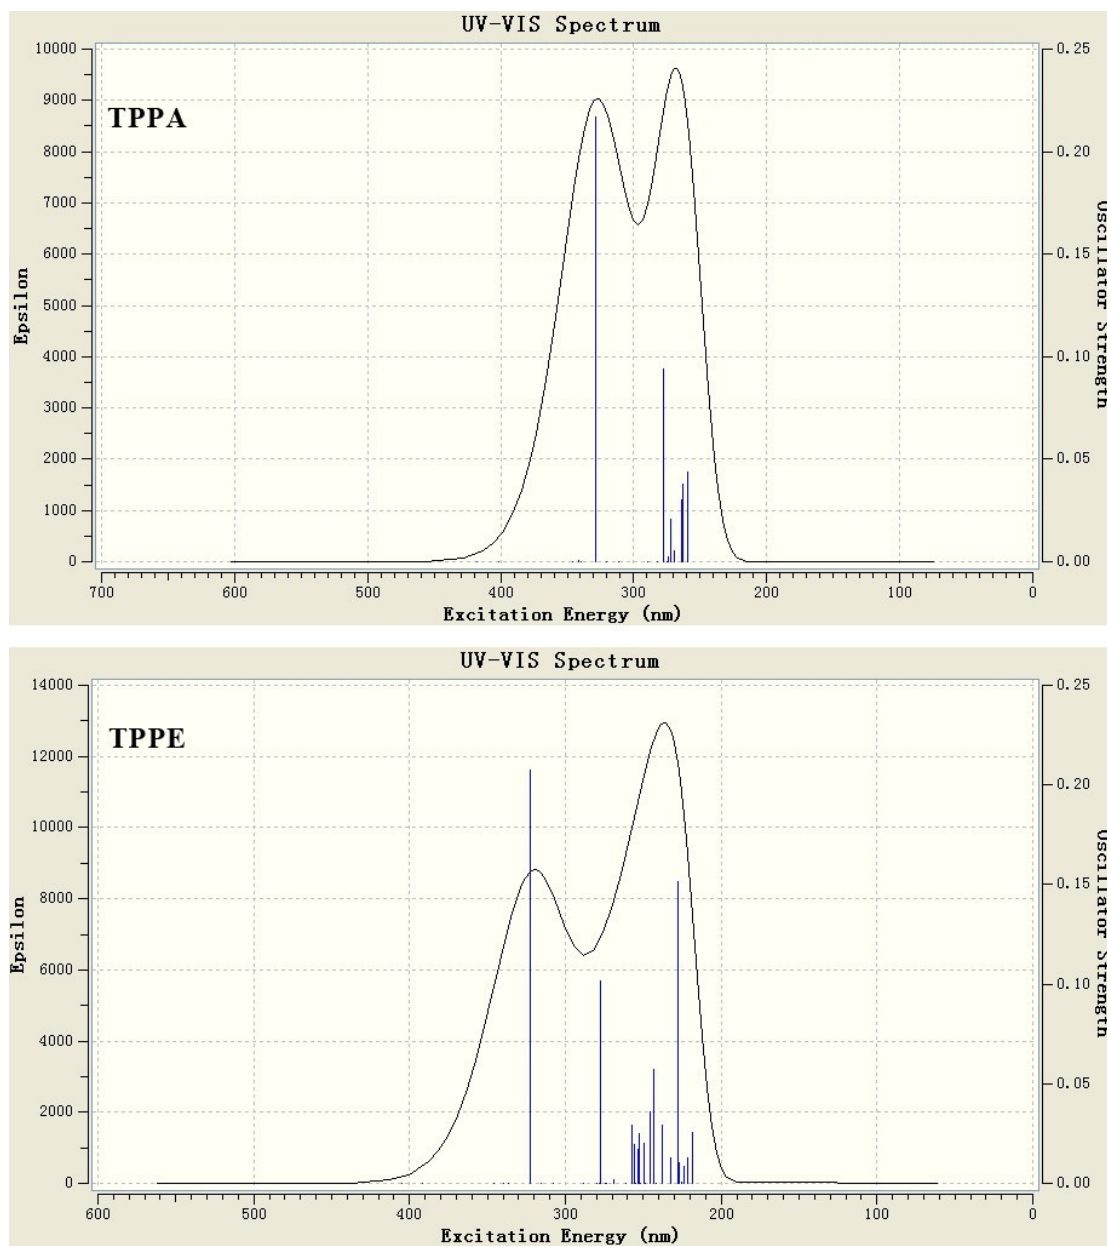

**Fig. S3** UV-Vis absorption spectra of TPPA and TPPE based on the optimal structure at ground state.

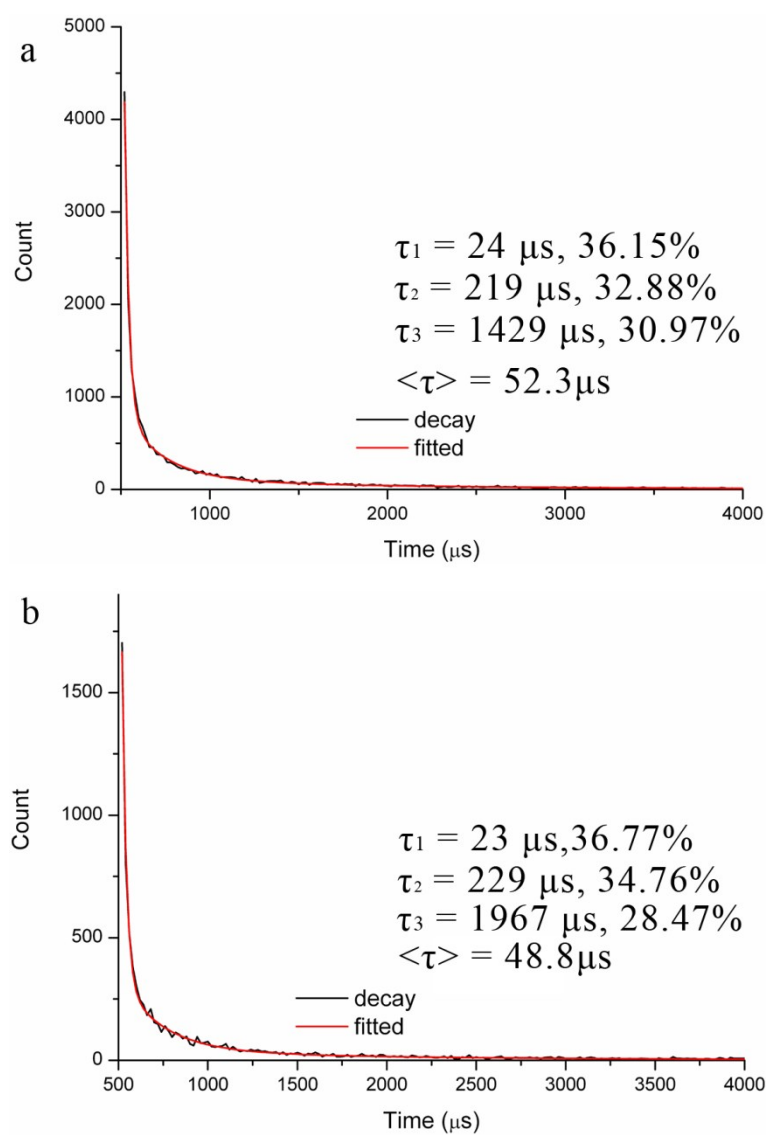

**Fig. S4** Decay curves of **TPPA** (a) and **TPPE** in methylcyclohexane in  $\text{N}_2$  atmosphere.  $\lambda_{\text{ex}} = 300$  nm,  $\lambda_{\text{em}} = 547$ , and 530 nm for **TPPA** and **TPPE**, respectively.

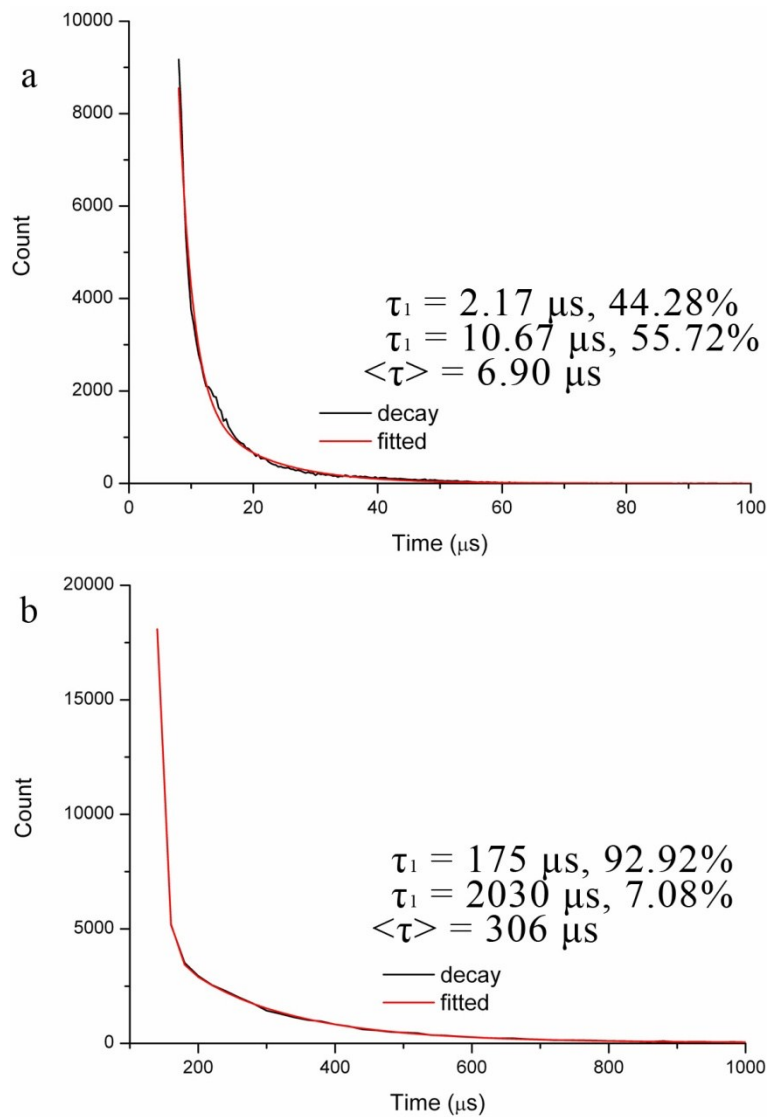

**Fig. S5** Decay curves of **TPPA** and **TPPE** crystals.  $\lambda_{\text{ex}} = 300 \text{ nm}$ ,  $\lambda_{\text{em}} = 550 \text{ nm}$  and  $515 \text{ nm}$  for **TPPA** and **TPPE**, respectively.

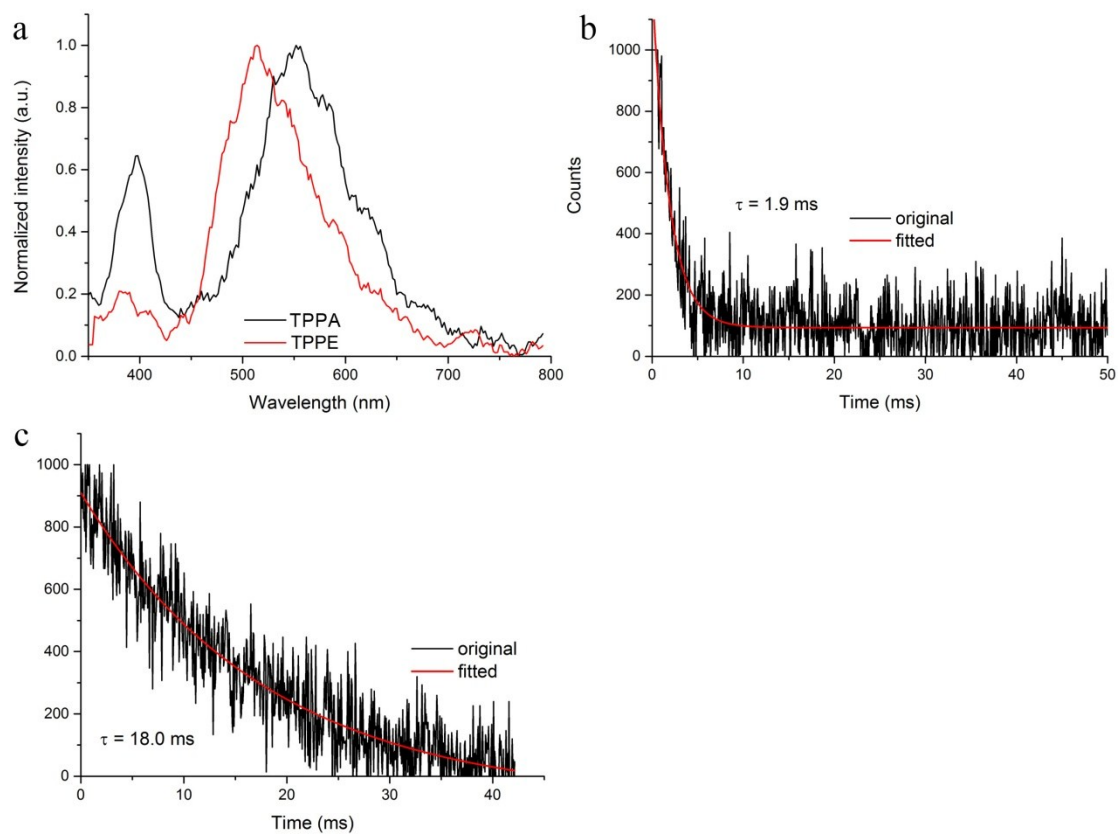

**Fig. S6** (a) Luminescence spectra of TPPA and TPPE crystals at 77k. Decay curves of (b) **TPPA** and (c) **TPPE** crystals at 77k.  $\lambda_{\text{ex}} = 300$  nm,  $\lambda_{\text{em}} = 550$  nm and 515 nm for **TPPA** and **TPPE**, respectively.

**Table S3.** Crystallographic data and details of measurements for **TPPA** and **TPPE**.

|                                        | <b>TPPA</b>                        | <b>TPPE</b>                        |
|----------------------------------------|------------------------------------|------------------------------------|
| Formula                                | C <sub>19</sub> H <sub>15</sub> OP | C <sub>20</sub> H <sub>17</sub> OP |
| Fw                                     | 290.28                             | 304.31                             |
| cryst system                           | orthorhombic                       | triclinic                          |
| space group                            | Pbca                               | p-1                                |
| Z                                      | 8                                  | 2                                  |
| a (Å)                                  | 10.1947(6)                         | 8.5525(14)                         |
| b (Å)                                  | 8.7300(5)                          | 10.3525(17)                        |
| c (Å)                                  | 34.4274(16)                        | 10.5874(17)                        |
| α (deg)                                | 90.000                             | 114.517(16)                        |
| β (deg)                                | 90.000                             | 99.585(14)                         |
| γ (deg)                                | 90.000                             | 90.156(13)                         |
| V (Å <sup>3</sup> )                    | 3064.0(3)                          | 838.3(3)                           |
| D <sub>calc</sub> (g/cm <sup>3</sup> ) | 1.259                              | 1.206                              |
| μ (mm <sup>-1</sup> )                  | 0.175                              | 0.163                              |
| Measd reflns                           | 3475                               | 3389                               |
| wR <sub>2</sub>                        | 0.1291                             | 0.1460                             |
| R                                      | 0.0548                             | 0.0516                             |
| CCDC number                            | 1446727                            | 1446729                            |

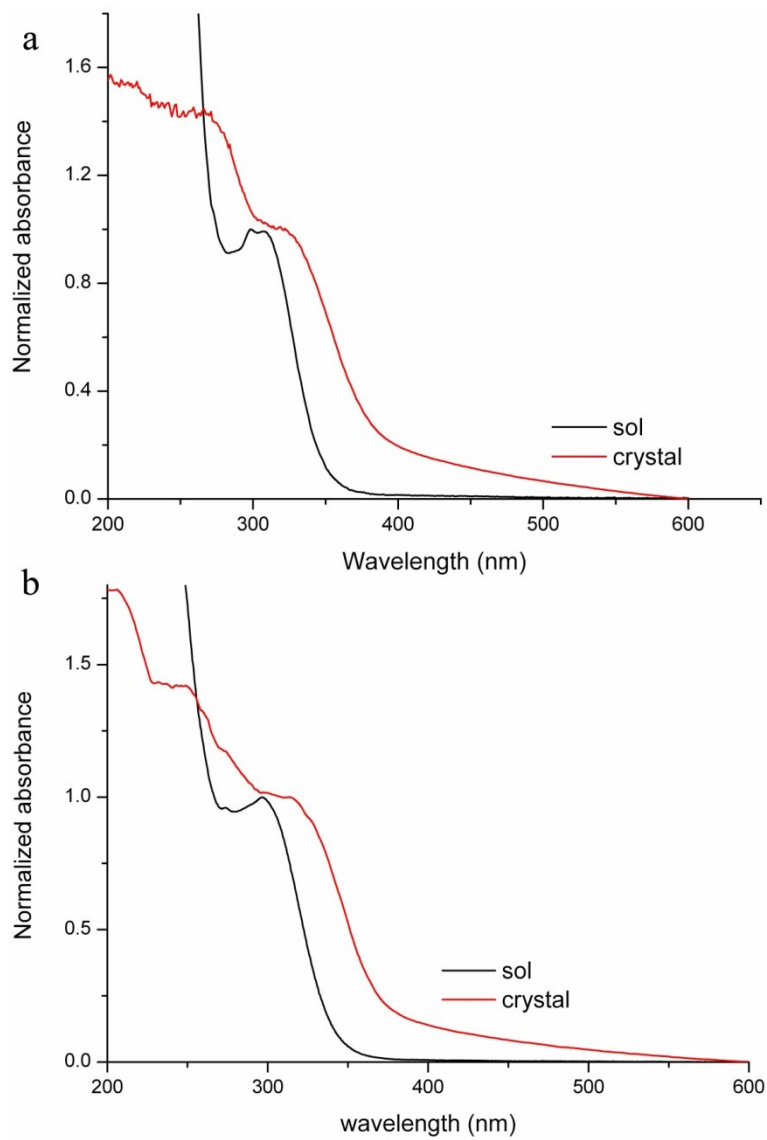

**Fig. S7** UV-Vis absorption spectra of **TPPA** (a) and **TPPE** (b) in methylcyclohexane solution and crystal phase.

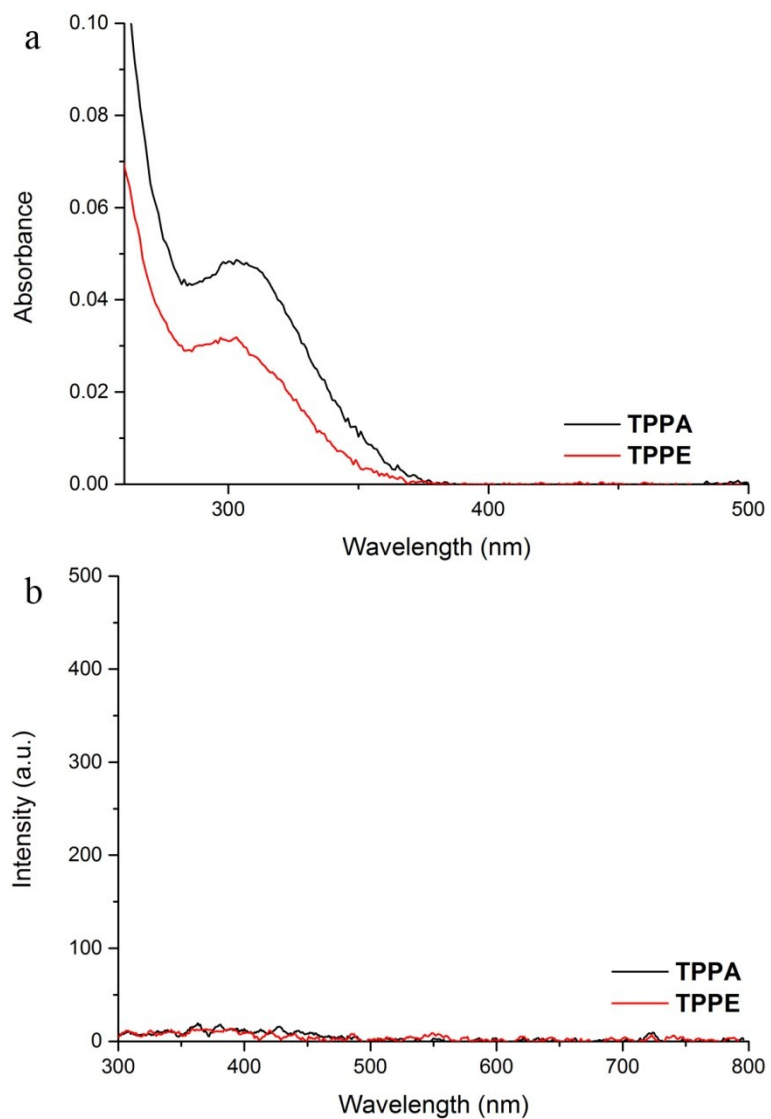

**Fig. S8** (a) Absorption and (b) emission spectra of **TPPA** and **TPPE** in the mixtures of DMSO/H<sub>2</sub>O (V/V = 1/9).

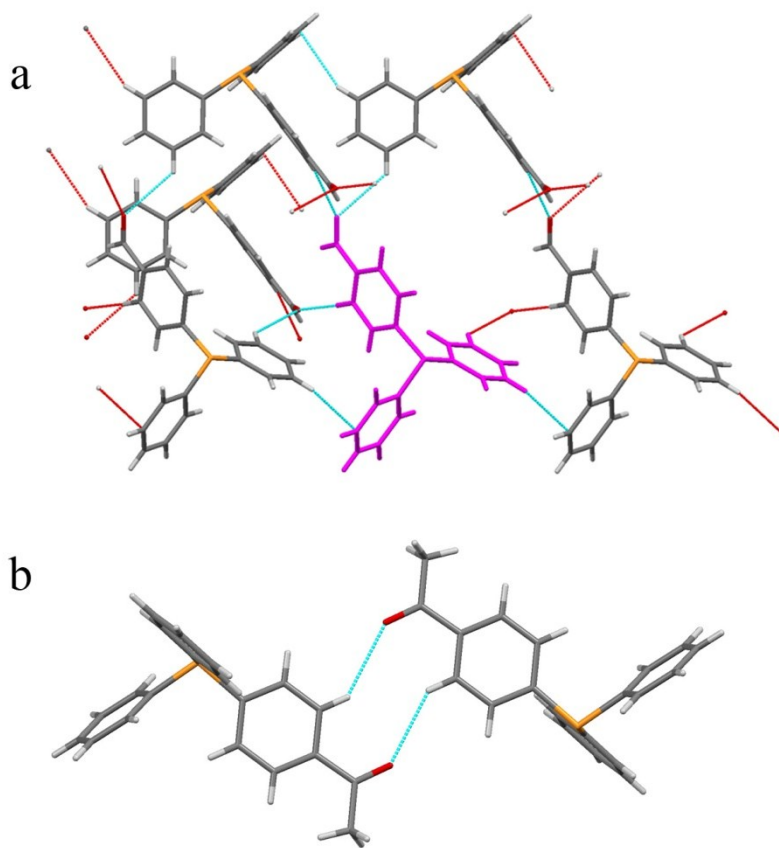

**Fig. S9** Intermolecular interactions in **TPPA** (a) and **TPPE** (b).
